# Supplementary material for: Quantitative humoral profiling of the HIV-1 proteome in elite controllers and patients with very long-term efficient antiretroviral therapy
Source: PubMed Central journal article supplement (PMC5429677; doi:10.1038/s41598-017-00759-8), 2017-04-06

**Quantitative humoral profiling of the HIV-1 proteome in elite controllers and patients' with very long-term efficient antiretroviral therapy**

Wang Zhang<sup>1,2</sup>, Mohammed M. Morshed<sup>1</sup>, Kajsa Noyan<sup>1</sup>, Aman Russom<sup>2</sup>, Anders Sönnernborg<sup>1,3</sup>, Ujjwal Neogi<sup>1,\*</sup>

<sup>1</sup>Division of Clinical Microbiology, Department of Laboratory Medicine, Karolinska Institutet, Huddinge, Stockholm, Sweden

<sup>2</sup>Science for Life Laboratory, Division of Proteomics and Nanobiotechnology, KTH Royal Institute of Technology, Solna, Stockholm, Sweden.

<sup>3</sup>Department of Medicine Huddinge, Unit of Infectious Diseases, Karolinska Institutet, Karolinska University Hospital, Stockholm, Sweden

**Table S1. Characteristics of 19 elite controllers (ECs) in whom the plasma HIV RNA load has been undetectable in the absence of antiretroviral treatment.**

| Patient | Age | Gender | Ethnicity | Inclusion criteria* | Mode of Transmission | No. of years of HIV infection | CD4 count, median (min-max) | CD4%, median (min-max) | CD8 count, median (min-max) | CD8%, median (min-max) | CD4/CD8 ratio, median (min-max) |
|---------|-----|--------|-----------|---------------------|----------------------|-------------------------------|-----------------------------|------------------------|-----------------------------|------------------------|---------------------------------|
| #1      | 62  | Male   | Caucasian | 2                   | Heterosexual         | 9                             | 550 (380-610)               | 28 (21-30)             | 950 (660-1490)              | 48.5 (45-60)           | 0.59 (0.37-0.62)                |
| #2      | 52  | Male   | Black     | 1                   | Heterosexual         | 3                             | 955 (630-1180)              | 41 (33-46)             | 745 (100-860)               | 35 (34-39)             | 1.18 (0.84-1.37)                |
| #3      | 46  | Female | Black     | 1                   | Heterosexual         | 14                            | 653 (520-820)               | 42 (37.5-47)           | 490 (390-545)               | 32.5 (30.5-35)         | 1.32 (1.18-1.49)                |
| #4      | 41  | Female | Black     | 1                   | Heterosexual         | 5                             | 765 (630-980)               | 31 (28.5-33)           | 1068 (900-1180)             | 42.3 (40.5-47)         | 0.72 (0.65-0.83)                |
| #5      | 40  | Female | Black     | 1                   | Heterosexual         | 3                             | 755 (660-790)               | 47 (45-47.5)           | 528 (480-610)               | 33.5 (32.5-35)         | 1.41 (1.3-1.46)                 |
| #6      | 44  | Female | Black     | 1                   | Heterosexual         | 19                            | 645 (508-880)               | 32 (27-38)             | 855 (730-1010)              | 47 (41-52)             | 0.65 (0.59-0.92)                |
| #7      | 51  | Male   | Caucasian | 1                   | MSM                  | 11                            | 1258 (950-1354)             | 47 (42-50)             | 843 (610-986)               | 32 (30.5-35)           | 1.52 (1.22-1.59)                |
| #8      | 56  | Male   | Caucasian | 1                   | PWID                 | 29                            | 730 (400-1130)              | 39 (23-48)             | 559 (305-1025)              | 28.5 (21-40)           | 1.37 (0.68-1.9)                 |
| #9      | 68  | Male   | Caucasian | 1                   | MSM                  | 6                             | 1040 (801-1210)             | 46 (43-48)             | 657 (570-680)               | 28 (26-35)             | 1.68 (1.23-1.83)                |
| #10     | 45  | Male   | Caucasian | 1                   | Blood product        | 33                            | 714 (590-962)               | 36.5 (27.5-44)         | 649 (433-1352)              | 30 (21.7-56.5)         | 1.21 (0.49-1.73)                |
| #11     | 49  | Male   | Black     | 2                   | Heterosexual         | 11                            | 673 (520-810)               | 21 (19-22)             | 2103 (1410-2450)            | 64 (60-65)             | 0.33 (0.3-0.36)                 |
| #12     | 55  | Male   | Caucasian | 2                   | MSM                  | 29                            | 930 (778-1268)              | 43 (34-47)             | 621 (498-888)               | 27.3 (24-34)           | 1.49 (1.02-1.96)                |
| #13     | 32  | Female | Black     | 1                   | Blood product        | 8                             | 959 (777-1240)              | 43.3 (38-47)           | 610 (610-610)               | 30 (30-30)             | 1.32 (1.32-1.32)                |
| #14     | 48  | Male   | Latin     | 1                   | MSM                  | 4                             | 995 (870-1270)              | 39.5 (37-45.5)         | 885 (790-965)               | 34.3 (34-35)           | 1.1 (1.1-1.3)                   |
| #15     | 28  | Female | Black     | 1                   | Unknown              | 5                             | 947 (792-1096)              | 37 (33-40.5)           | 949 (810-1072)              | 34 (32.5-37.5)         | 1.07 (0.95-1.26)                |
| #16     | 40  | Female | Black     | 1                   | Heterosexual         | 5                             | 606 (504-695)               | 45.8 (43-48)           | 403 (367-439)               | 35.4 (35.3-35.5)       | 1.34 (1.1-1.55)                 |
| #17     | 43  | Female | Caucasian | 1                   | Heterosexual         | 14                            | 1096 (636-1535)             | 45 (38-57.5)           | 827 (530-1058)              | 33 (28-38)             | 1.42 (1.05-2.31)                |
| #18     | 49  | Female | Caucasian | 1                   | PWID                 | 6                             | 1334 (1095-1620)            | 45.8 (39.5-48.5)       | 1000 (765-1358)             | 32.5 (28-44)           | 1.44 (0.9-1.68)                 |
| #19     | 36  | Male   | Black     | 2                   | Heterosexual         | 12                            | 1320 (921-1810)             | 60 (54-62)             | 511 (430-610)               | 23 (20-26.5)           | 2.69 (1.05-3.22)                |

NOTE. MSM, men who have sex with men; PWID, people who inject drugs; ND, not determined; \* HIV RNA levels <75 copies/ml on minimum 3 consecutive determinations, spanning over at least 12-months ART-free period with all previous determinations below 1000 copies/ml (1) or HIV positive status for ≥10 years with minimum 2 HIV RNA level determinations, ≥90% of all HIV RNA determinations below 400 copies/ml (2).

**Supplementary Table S2:** Characteristics of 19 patients with long-term antiretroviral treatment.

| <b>Patient</b> | <b>Age</b> | <b>Gender</b> | <b>Ethnicity</b> | <b>Mode of Transmission</b> | <b>No. of years of HIV infection</b> | <b>Years on ART</b> |
|----------------|------------|---------------|------------------|-----------------------------|--------------------------------------|---------------------|
| <b>#1</b>      | 49         | Male          | Black            | Unknown                     | 17                                   | 17                  |
| <b>#2</b>      | 52         | Male          | Black            | Heterosexual                | 20                                   | 20                  |
| <b>#3</b>      | 49         | Female        | Caucasian        | Heterosexual                | 25                                   | 19                  |
| <b>#4</b>      | 49         | Male          | Black            | Heterosexual                | 23                                   | 16                  |
| <b>#5</b>      | 62         | Male          | Caucasian        | IVDU                        | 30                                   | 20                  |
| <b>#6</b>      | 68         | Male          | Caucasian        | Heterosexual                | 20                                   | 16                  |
| <b>#7</b>      | 56         | Male          | Caucasian        | MSM                         | 30                                   | 16                  |
| <b>#8</b>      | 55         | Male          | Caucasian        | IVDU                        | 26                                   | 15                  |
| <b>#9</b>      | 62         | Male          | Caucasian        | Heterosexual                | 22                                   | 20                  |
| <b>#10</b>     | 51         | Male          | Caucasian        | Heterosexual                | 18                                   | 18                  |
| <b>#11</b>     | 62         | Male          | Caucasian        | MSM                         | 13                                   | 13                  |
| <b>#12</b>     | 51         | Male          | Caucasian        | Heterosexual                | 19                                   | 19                  |
| <b>#13</b>     | 41         | Female        | Black            | Heterosexual                | 16                                   | 16                  |
| <b>#14</b>     | 45         | Male          | Caucasian        | Heterosexual                | 17                                   | 16                  |
| <b>#15</b>     | 48         | Male          | Caucasian        | MSM                         | 17                                   | 17                  |
| <b>#16</b>     | 56         | Male          | Caucasian        | MSM                         | 31                                   | 20                  |
| <b>#17</b>     | 53         | Male          | Caucasian        | MSM                         | 28                                   | 15                  |
| <b>#18</b>     | 40         | Female        | Asian            | Heterosexual                | 19                                   | 19                  |
| <b>#19</b>     | 68         | Male          | Caucasian        | IVDU                        | 27                                   | 16                  |

**Figure S1. Effect of HIV-1 subtype in determining the Ab response using modified LIPS-assay.** Cluster analysis and principal component analysis (PCA) using samples from 38 viremic patients representing HIV-1B, HIV-1C, HIV-1A1, CRF01\_AE, CRF02\_AG and a novel recombinant BF1.

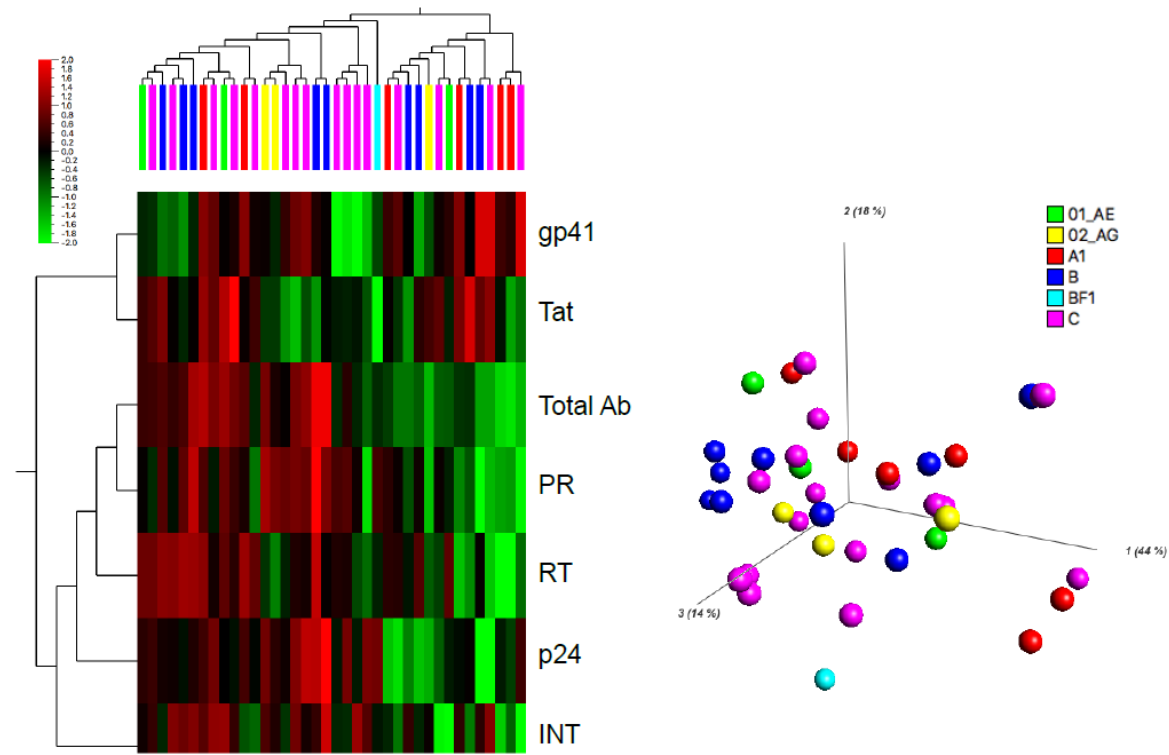

Supplement: 41598_2017_759_MOESM1_ESM.pdf [file 41598_2017_759_MOESM1_ESM.pdf]
